# Supplementary material
Source: PubMed Central journal article supplement (PMC5664226)
Supplement: NIHMS915042-supplement-Supp1.pdf [file NIHMS915042-supplement-Supp1.pdf]

Supplement of Atmos. Chem. Phys., 17, 9261–9275, 2017  
<https://doi.org/10.5194/acp-17-9261-2017-supplement>  
© Author(s) 2017. This work is distributed under  
the Creative Commons Attribution 3.0 License.

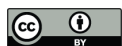

*Supplement of*

## **NO<sub>x</sub> emission trends over Chinese cities estimated from OMI observations during 2005 to 2015**

**Fei Liu et al.**

*Correspondence to:* Fei Liu ([fei.liu@nasa.gov](mailto:fei.liu@nasa.gov), [liuf1010@gmail.com](mailto:liuf1010@gmail.com)) and Qiang Zhang ([qiangzhang@tsinghua.edu.cn](mailto:qiangzhang@tsinghua.edu.cn))

The copyright of individual parts of the supplement might differ from the CC BY 3.0 License.

Table S1 Summary of power plants and cities investigated in this study.

| Category     | ID | Location    | Latitude | Longitude | Mountainous |
|--------------|----|-------------|----------|-----------|-------------|
| Power plants | 1  | Guixi       | 28.2     | 117.1     |             |
|              | 2  | Huolin      | 45.5     | 119.7     |             |
|              | 3  | Shangdu     | 42.2     | 116.0     |             |
|              | 4  | Tuoketuo    | 40.2     | 111.4     |             |
|              | 5  | Jingyuan    | 36.7     | 104.8     | Y           |
|              | 6  | Kaiyuan     | 23.8     | 103.2     | Y           |
|              | 7  | Shentou     | 39.4     | 112.6     | Y           |
| Cities       | 8  | Changchun   | 43.9     | 125.4     |             |
|              | 9  | Changsha    | 28.2     | 113.0     |             |
|              | 10 | Changzhi    | 36.2     | 113.1     |             |
|              | 11 | Chengde     | 40.9     | 117.9     |             |
|              | 12 | Daqing      | 46.6     | 125.1     |             |
|              | 13 | Fuzhou      | 26.1     | 119.3     |             |
|              | 14 | Guangzhou * | 23.0     | 113.3     |             |
|              | 15 | Guiyang     | 26.7     | 106.6     |             |
|              | 16 | Hangzhou    | 30.3     | 120.2     |             |
|              | 17 | Harbin      | 45.8     | 126.8     |             |
|              | 18 | Hefei       | 31.8     | 117.2     |             |
|              | 19 | Huainan     | 32.7     | 117.0     |             |
|              | 20 | Jinzhou     | 41.1     | 121.1     |             |
|              | 21 | Jiujiang    | 29.7     | 116.0     |             |
|              | 22 | Karamay     | 45.7     | 85.0      |             |
|              | 23 | Kunming     | 25.0     | 102.8     |             |
|              | 24 | Linyi       | 35.1     | 118.3     |             |
|              | 25 | Liuzhou     | 24.3     | 109.4     |             |
|              | 26 | Longyan     | 25.1     | 117.0     |             |
|              | 27 | Nanchang    | 28.6     | 115.8     |             |
|              | 28 | Nanjing     | 32.1     | 118.8     |             |
|              | 29 | Nanning     | 22.8     | 108.4     |             |
|              | 30 | Qingdao     | 36.1     | 120.2     |             |
|              | 31 | Qiqihar     | 47.3     | 124.0     |             |
|              | 32 | Shanghai    | 31.2     | 121.5     |             |
|              | 33 | Shantou     | 23.4     | 116.7     |             |
|              | 34 | Shenyang    | 41.8     | 123.4     |             |
|              | 35 | Tangshan    | 39.6     | 118.2     |             |
|              | 36 | Tianjin     | 39.1     | 117.3     |             |
|              | 37 | Tonghua     | 41.8     | 126.0     |             |
|              | 38 | Wuhai       | 39.5     | 106.7     |             |
|              | 39 | Wuhan       | 30.6     | 114.3     |             |
|              | 40 | Xiangyang   | 32.0     | 112.1     |             |
|              | 41 | Yueyang     | 29.4     | 113.1     |             |
|              | 42 | Baoji       | 34.4     | 107.3     | Y           |
|              | 43 | Baotou      | 40.6     | 109.8     | Y           |
|              | 44 | Beijing     | 39.9     | 116.4     | Y           |

|    |           |      |       |   |
|----|-----------|------|-------|---|
| 45 | Chongqing | 29.6 | 106.6 | Y |
| 46 | Datong    | 40.1 | 113.3 | Y |
| 47 | Jiayuguan | 39.8 | 98.0  | Y |
| 48 | Kumul     | 43.0 | 93.5  | Y |
| 49 | Lanzhou   | 36.1 | 103.8 | Y |
| 50 | Panzhuhua | 26.6 | 101.7 | Y |
| 51 | Taiyuan   | 37.9 | 112.3 | Y |
| 52 | Urumqi    | 43.8 | 87.7  | Y |
| 53 | Wenzhou   | 28.0 | 120.7 | Y |
| 54 | Xi'an     | 34.3 | 108.9 | Y |
| 55 | Zhangye   | 38.9 | 100.4 | Y |

---

Guangzhou\* represents the cities of Guangzhou, Foshan and Dongguan.
